# Supplementary material for: SUV39 SET domains mediate crosstalk of heterochromatic histone marks
Source: eLife. 2021 Sep 15;10:e62682. doi: 10.7554/eLife.62682 (PMC8443253; doi:10.7554/eLife.62682)
Supplement: Supplementary file 2. [file elife-62682-supp2.xlsx]

## Sheet: Clr4_deuteration_table
Table S1
Deuteration table showing deuterium incorporation levels for Clr4 alone (Clr4), when in complex with H3K14ub peptide (Clr4 + H3-Ubiq.) and when in complex with non-modified H3 peptide (Clr4 + H3 pept).
For each peptide analyzed, deuteration levels are shown as percentage deuteration compared to to the theretical maximal deuteration level (% Deuteration) and as the number of deuterons incorporated into each peptide (Nb of deuterons). Standard deviation for each measurement is shown on the right.
						Clr4					Clr4					Clr4					Clr4							Clr4 + H3-Ubiq.					Clr4 + H3-Ubiq.					Clr4 + H3-Ubiq.					Clr4 + H3-Ubiq.
					% Deuteration					Std. Dev (% deut)					Nb of deuterons					Std. Dev (# deut)							% Deuteration					Std. Dev (% deut)					Nb of deuterons					Std. Dev (# deut)							% Deuteration
Start	End	Charge	RT	Start	3s	30s	300s	3000s		3s	30s	300s	3000s		3s	30s	300s	3000s		3s	30s	300s	3000s				3s	30s	300s	3000s		3s	30s	300s	3000s		3s	30s	300s	3000s		3s	30s	300s	3000s				3s
192	200	2	12.23	SKLDSYTHL	33.232	32.283	35.486	35.056		-	0.176777	1.71544	4.35861		1.901	1.846	2.0295	2.005		-	0.00989949	0.0982878	0.248902				33.129	34.791	35.6715	35.805		0.71842	5.0841	1.44745	3.701		1.895	1.9895	2.0405	2.0475		0.0410122	0.290621	0.0827315	0.211425				37.506
192	202	2	16.24	SKLDSYTHLSF	34.0075	34.1695	37.1575	36.163		2.88995	0.485782	3.48109	3.36724		2.5005	2.5125	2.732	2.659		0.212839	0.0360624	0.255973	0.247487				34.6105	36.052	37.0255	35.8915		0.511238	3.025	0.645588	3.4528		2.5445	2.651	2.7225	2.6395		0.0374767	0.222032	0.0473762	0.253851				38.8545
195	202	2	16.7	DSYTHLSF	36.942	37.463	37.7425	39.27		3.30785	1.37037	4.95894	2.4678		1.811	1.8365	1.85	1.925		0.162635	0.0671751	0.243245	0.121622				37.6145	38.227	39.108	38.618		0.325976	0.272943	1.6419	5.15622		1.844	1.8735	1.917	1.893		0.0155563	0.013435	0.0806102	0.253144				42.024
203	208	2	4.8	YEKREL	1.912	8.3375	18.551	38.905		0.69155	1.22966	0.900854	3.39977		0.0625	0.2725	0.606	1.2715		0.0219203	0.0403051	0.0296985	0.111016				1.4685	8.715	18.626	38.2835		1.79393	0.492146	0.0565685	0.586192		0.048	0.2845	0.6085	1.2515		0.0579828	0.0162635	0.00212132	0.0190919				1.9465
203	215	4	6.13	YEKRELFRKKLRE	0.6685	2.073	6.5065	13.1145		0.277893	0.183848	0.639932	1.40078		0.06	0.1865	0.5845	1.179		0.0254558	0.0162635	0.0572756	0.125865				0.63	2.069	6.259	12.432		0.176777	0.22486	0.183848	1.7211		0.0565	0.186	0.5625	1.1175		0.0162635	0.019799	0.0162635	0.154856				0.839
209	223	3	12.01	FRKKLREIEGPEVTL	9.277	10.919	18.044	27.2		0.383252	0.178191	1.88798	2.8454		0.9095	1.0705	1.769	2.6665		0.0374767	0.0176777	0.185262	0.279307				9.251	11.3885	18.492	27.4665		0.212132	0.724784	0.352139	2.93096		0.907	1.1165	1.813	2.693		0.0212132	0.0714178	0.0339411	0.287085				10.994
209	223	4	12.01	FRKKLREIEGPEVTL	8.966	10.5075	17.4645	26.604		0.79196	0.142128	1.69776	2.30658		0.879	1.03	1.712	2.608		0.0777817	0.0141421	0.166877	0.226274				9.327	11.2165	17.833	26.7485		0.448306	1.05571	0.632153	3.45987		0.914	1.0995	1.7485	2.6225		0.0438406	0.103945	0.0615183	0.338704				11.0035
216	223	1	16.35	IEGPEVTL	18.779	22.6045	35.8345	49.3175		0.995606	0.422143	2.3285	2.58165		0.767	0.9235	1.464	2.0145		0.0410122	0.0176777	0.0947523	0.105359				18.6135	23.384	36.642	49.3455		0.241123	2.87227	0.560029	3.85585		0.76	0.955	1.497	2.0155		0.00989949	0.11738	0.0226274	0.157685				20.8075
224	236	1	14.46	VNEVDDEPCPSLD	19.347	20.029	24.8325	35.1055		2.10011	0.912168	3.54473	1.35552		1.4225	1.4725	1.826	2.5815		0.154856	0.0671751	0.260215	0.0997021				17.3455	19.8995	24.6115	36.7065		0.242538	0.555079	0.854892	4.53326		1.2755	1.463	1.8095	2.699		0.0176777	0.0410122	0.0629325	0.333754				22.766
224	237	1	18.62	VNEVDDEPCPSLDF	13.9585	18.2095	22.5615	28.3545		1.97071	0.540937	3.11056	0.977929		1.1405	1.4875	1.8435	2.3165		0.160513	0.0445477	0.253851	0.0799031				12.0385	17.3575	18.4565	30.588		1.44603	2.61276	3.06531	-		0.9835	1.418	1.508	2.499		0.118087	0.213546	0.250316	-				18.3795
237	242	1	16.27	FQFISQ	23.207	29.255	33.159	43.793		1.86535	0.00282843	1.32088	2.72095		0.7585	0.956	1.0835	1.431		0.0615183	0	0.0431335	0.0890955				27.767	32.35	42.3905	46.0495		0.446891	0.657609	0.536694	3.1247		0.9075	1.057	1.3855	1.505		0.0148492	0.0212132	0.0176777	0.101823				28.486
243	256	2	17.33	YRLTQGVIPPDPNF	30.667	47.172	48.5475	48.469		3.26118	0.67458	4.11465	2.18496		2.255	3.469	3.57	3.564		0.240416	0.0494975	0.302642	0.16122				17.012	33.579	43.007	45.239		0.125865	3.15087	2.15385	8.01293		1.2505	2.469	3.162	3.3265		0.00919239	0.231931	0.158392	0.58902				36.283
243	261	2	15.98	YRLTQGVIPPDPNFQSGCN	28.137	39.4405	38.876	38.811		2.25567	0.342947	3.76605	1.43967		3.2185	4.511	4.4465	4.4395		0.258094	0.039598	0.430628	0.164756				13.9665	27.0995	31.3815	33.9315		0.389616	3.20532	4.11183	8.05182		1.5975	3.0995	3.5895	3.881		0.0445477	0.366988	0.470226	0.920653				33.8005
262	276	2	12.44	CSSLGGCDLNNPSRC	29.5945	38.5915	42.857	44.3545		1.75857	0.416486	3.57089	2.25355		2.9015	3.7835	4.2015	4.3485		0.171827	0.0403051	0.350018	0.221324				28.991	38.592	42.77	44.7005		0.260215	1.42836	0.714178	5.09329		2.842	3.784	4.1935	4.382		0.0254558	0.140007	0.0700036	0.499217				32.791
263	276	2	11.97	SSLGGCDLNNPSRC	31.1025	40.9335	46.2725	48.0775		1.8505	0.357089	2.89277	3.62534		2.7955	3.6785	4.1585	4.3205		0.16617	0.0318198	0.259508	0.325976				30.407	41.1155	46.965	48.868		0.770746	1.61008	0.81883	4.36426		2.733	3.695	4.221	4.3915		0.0692965	0.14425	0.0735391	0.392444				33.728
263	278	2	13.52	SSLGGCDLNNPSRCEC	21.923	29.706	33.926	35.7575		1.76635	0.719835	4.98793	3.07379		2.3285	3.155	3.6035	3.798		0.187383	0.0763675	0.529623	0.326683				20.6065	29.2845	34.2525	34.902		0.716299	0.461741	1.06844	5.22269		2.1885	3.1105	3.638	3.707		0.0756604	0.0487904	0.113137	0.554372				25.422
270	276	2	4.08	LNNPSRC	37.9485	46.754	66.743	66.1955		0.269408	2.12839	4.97237	5.54442		1.24	1.528	2.181	2.163		0.00848528	0.0692965	0.162635	0.181019				38.475	45.771	59.1015	65.591		2.47912	0.842871	1.36118	0.783474		1.2575	1.4955	1.9315	2.1435		0.0813173	0.0275772	0.0445477	0.026163				38.2105
279	288	2	15.38	LDDLDEPTHF	11.865	17.5465	20.7665	22.0705		0.483661	0.072832	2.77398	2.60852		0.6785	1.0035	1.1875	1.2625		0.0275772	0.00353553	0.159099	0.1492				9.641	16.064	21.141	22.3875		0.234759	0.612354	0.137179	3.43442		0.5515	0.9185	1.2095	1.28		0.013435	0.0346482	0.00777817	0.196576				14.092
279	290	2	16.75	LDDLDEPTHFAY	7.0115	13.142	22.779	26.0945		1.37391	0.885298	3.35169	2.08667		0.5155	0.966	1.675	1.9185		0.101116	0.0650538	0.246073	0.153442				6.006	9.6115	18.344	25.024		0.19799	0.357089	0.41295	4.36851		0.4415	0.7065	1.3485	1.84		0.0148492	0.026163	0.0304056	0.321026				9.0435
279	301	3	14.87	LDDLDEPTHFAYDAQGRVRADTG	21.1085	32.633	52.3825	60.323		1.03308	1.41987	1.65534	3.06319		3.449	5.332	8.559	9.857		0.168291	0.231931	0.270115	0.500632				19.91	28.5425	41.5315	57.141		0.383252	1.94949	0.699329	1.78191		3.2535	4.664	6.786	9.337		0.0629325	0.318198	0.114551	0.291328				22.6625
280	288	2	14.25	DDLDEPTHF	15.458	20.701	23.4565	23.229		1.42128	0.202233	2.89984	3.15794		0.758	1.015	1.1495	1.1385		0.0692965	0.00989949	0.142128	0.154856				13.706	20.0405	23.696	24.7895		0.185262	1.61432	0.190919	3.25198		0.6715	0.982	1.1615	1.215		0.00919239	0.079196	0.00919239	0.159806				17.936
280	290	2	16.03	DDLDEPTHFAY	8.727	14.427	23.4655	27.3505		0.554372	0.725492	3.01864	2.99318		0.5705	0.9425	1.5335	1.7875		0.0360624	0.0473762	0.197283	0.195869				6.8645	10.9845	19.8505	26.2415		0.092631	0.194454	0.178898	3.83888		0.4485	0.718	1.2975	1.7155		0.00636396	0.0127279	0.0120208	0.251023				10.2085
280	302	3	15.07	DDLDEPTHFAYDAQGRVRADTGA	24.7435	37.307	54.678	63.3595		0.19304	0.475176	1.54008	2.80934		4.043	6.096	8.934	10.353		0.0311127	0.0777817	0.25173	0.459619				22.89	33.235	44.4175	61.554		0.616597	2.63185	1.39088	3.38704		3.74	5.431	7.258	10.058		0.100409	0.429921	0.227688	0.552958				25.9525
282	288	2	11.86	LDEPTHF	14.5895	22.4215	22.864	22.104		4.52902	1.54361	5.16895	2.79731		0.4765	0.7325	0.7475	0.7225		0.147785	0.0502046	0.168999	0.0912168				17.288	21.506	24.7375	22.899		1.6221	2.0393	1.75857	2.27123		0.5645	0.703	0.8085	0.7485		0.053033	0.066468	0.0572756	0.0742462				19.531
289	302	2	7.58	AYDAQGRVRADTGA	30.272	45.657	58.2795	62.1195		1.17097	0.131522	2.73721	5.48361		2.968	4.476	5.7135	6.09		0.114551	0.0127279	0.267993	0.537401				27.8745	40.8355	50.562	64.7335		0.0827315	1.93394	0.142836	7.99526		2.733	4.0035	4.957	6.3465		0.00848528	0.190212	0.0141421	0.784181				31.3185
289	302	3	7.58	AYDAQGRVRADTGA	31.5525	45.5695	56.893	62.234		1.13066	0.591848	0.937624	2.85247		3.0935	4.468	5.578	6.1015		0.111016	0.0579828	0.0919239	0.279307				28.356	39.757	50.049	60.8025		1.26855	2.90479	0.230517	0.234052		2.78	3.8975	4.907	5.961		0.124451	0.284964	0.0226274	0.0226274				31.3365
291	305	3	12.21	DAQGRVRADTGAVIY	23.543	34.47	54.3435	63.689		0.404465	0.445477	0.846407	2.20759		2.5005	3.6615	5.7715	6.7645		0.0431335	0.0473762	0.0898026	0.234052				20.926	31.634	44.1315	63.539		0.243245	0.776403	0.702157	4.23274		2.2225	3.36	4.687	6.7485		0.026163	0.0820244	0.0749533	0.449013				23.5155
303	310	1	16.77	VIYECNSF	2.9185	6.4785	15.2875	23.8885		2.45437	1.10521	2.65801	0.690843		0.143	0.3175	0.7495	1.171		0.120208	0.0544472	0.130815	0.0339411				4.445	5.119	11.7455	23.542		0.432749	0.110309	1.42341	2.82277		0.218	0.251	0.5755	1.154		0.0212132	0.00565685	0.0700036	0.138593				5.225
306	310	1	10.29	ECNSF	17.523	22.29	40.7285	41.791		1.62493	0.237588	1.0147	2.49609		0.4295	0.546	0.9985	1.0245		0.0403051	0.00565685	0.0247487	0.0615183				17.2105	19.6365	32.7775	42.1545		1.66241	0.594677	1.1646	1.38239		0.422	0.4815	0.8035	1.033		0.0410122	0.0148492	0.0289914	0.0339411				18.082
310	314	1	7.16	FCSCS	16.267	26.934	29.5225	43.0605		3.7109	1.07622	3.4132	0.802566		0.3985	0.6605	0.7235	1.0555		0.0912168	0.026163	0.0841457	0.0190919				14.8195	26.6785	29.871	40.8155		4.07506	1.49695	0.326683	0.318905		0.3635	0.654	0.732	1.0005		0.0997021	0.0367696	0.00848528	0.00777817				19.4225
315	333	4	18.12	MECPNRVVQRGRTLPLEIF	1.8665	2.817	5.171	12.1785		0.461741	0.552958	1.22047	0.755897		0.229	0.345	0.634	1.4925		0.0565685	0.0678823	0.149907	0.092631				1.733	2.477	5.0545	10.039		0.271529	0.0353553	0.0572756	2.44659		0.2125	0.3035	0.619	1.23		0.033234	0.00494975	0.00707107	0.299813				2.77
333	353	4	15.74	FKTKEKGWGVRSLRFAPAGTF	3.5525	4.699	7.336	11.8905		0.31042	0.186676	1.16673	1.17309		0.5225	0.691	1.079	1.749		0.0459619	0.0268701	0.17112	0.172534				3.2715	4.868	7.112	11.8015		0.0106066	0.53033	0.0183848	2.05273		0.481	0.716	1.046	1.7355		0.00141421	0.0777817	0.00282843	0.301935				4.401
334	352	5	12.69	KTKEKGWGVRSLRFAPAGT	4.9905	7.206	9.448	13.23		0.976514	0.786303	1.61645	1.44674		0.6525	0.942	1.235	1.7295		0.127986	0.103238	0.210718	0.188798				5.395	7.3255	9.7655	14.214		0.408708	0.32739	0.0120208	2.3278		0.705	0.9575	1.2765	1.858		0.0537401	0.0431335	0.00212132	0.304056				6.109
334	353	4	15.14	KTKEKGWGVRSLRFAPAGTF	3.8195	5.078	8.0165	13.3065		0.475883	0.250316	1.32724	1.15612		0.5305	0.7055	1.1135	1.8485		0.0657609	0.0346482	0.184555	0.160513				3.8335	5.4755	7.823	13.4145		0.0162635	0.465983	0.0876812	2.11496		0.5325	0.7605	1.0865	1.863		0.00212132	0.0643467	0.0120208	0.294156				4.6865
346	353	2	13.93	RFAPAGTF	2.6065	1.11	3.249	15.3325		1.88161	0.345068	0.551543	0.318905		0.1065	0.045	0.133	0.6265		0.0770746	0.0141421	0.0226274	0.013435				0.5135	0.8325	2.357	13.83		0.555079	0.119501	0.47659	2.21466		0.021	0.034	0.0965	0.565		0.0226274	0.00424264	0.0190919	0.0905097				0.838
354	358	1	17.31	ITCYL	7.781	7.8495	8.559	9.284		0.749533	0.0176777	2.35891	1.93182		0.191	0.1925	0.21	0.2275		0.0183848	0.000707107	0.0579828	0.0473762				5.6815	7.519	9.406	11.181		0.181726	0.199404	1.10874	1.0946		0.139	0.1845	0.2305	0.274		0.00424264	0.00494975	0.0275772	0.0268701				6.5385
358	366	1	11.35	LGEVITSAE	18.428	26.8355	35.3165	40.4715		1.65604	0.125158	0.768625	1.96505		1.054	1.535	2.02	2.3145		0.0947523	0.00707107	0.0438406	0.11243				18.0765	26.936	32.7935	41.4145		0.704985	1.65887	0.989242	3.32977		1.0335	1.5405	1.875	2.3685		0.0403051	0.0954594	0.0565685	0.190212				20.23
359	382	3	14.82	GEVITSAEAAKRDKNYDDDGITYL	11.022	26.359	34.145	34.705		0.767918	0.118794	3.76039	2.72802		1.981	4.738	6.137	6.238		0.138593	0.0212132	0.675994	0.490732				11.593	24.3325	32.0445	34.491		0.108894	2.14324	0.447599	4.82813		2.084	4.3735	5.76	6.1995		0.019799	0.385373	0.0806102	0.86762				16.6
361	366	1	4.45	VITSAE	33.276	50.959	66.5825	76.347		1.52452	0.186676	0.555079	2.14395		1.0875	1.6655	2.176	2.495		0.0502046	0.00636396	0.0183848	0.0707107				32.8805	49.2865	61.985	76.9985		0.635689	0.108187	0.379009	2.27335		1.0745	1.6105	2.0255	2.5165		0.0205061	0.00353553	0.0120208	0.0742462				34.083
361	382	3	14.36	VITSAEAAKRDKNYDDDGITYL	11.0565	26.5115	34.1	33.9625		0.93126	0.123744	4.22567	3.70595		1.8065	4.332	5.572	5.5495		0.152028	0.019799	0.690136	0.605991				12.7525	25.696	33.3495	34.786		0.178898	1.78332	0.0275772	4.62448		2.0835	4.199	5.449	5.684		0.0289914	0.291328	0.00424264	0.75519				16.6755
367	382	2	13.9	AAKRDKNYDDDGITYL	9.2485	21.108	26.2195	25.181		1.52382	0.0240416	3.58574	2.75913		1.058	2.414	2.999	2.88		0.173948	0.00282843	0.410122	0.31537				14.2875	24.608	26.374	26.0395		0.307591	2.15102	0.31537	2.89702		1.634	2.815	3.0165	2.9785		0.0353553	0.246073	0.0360624	0.331633				16.833
383	387	1	17.68	FDLDM	1.1095	3.516	13.898	21.4165		0.309006	0.554372	2.98682	3.64514		0.0275	0.0865	0.3405	0.525		0.00777817	0.013435	0.072832	0.0890955				-0.1175	1.0055	12.4635	19.303		0.866206	0.111016	0.301935	4.2384		-0.003	0.025	0.3055	0.4735		0.0212132	0.00282843	0.00777817	0.103945				1.354
388	393	1	5.96	FDDASE	29.7375	41.409	42.3975	40.752		1.56766	0.722663	0.24678	2.7167		0.972	1.3535	1.3855	1.332		0.0509117	0.0233345	0.00777817	0.0890955				31.8795	41.714	42.2835	41.5735		1.64119	2.8652	2.69478	0.477297		1.042	1.363	1.382	1.359		0.0537401	0.0933381	0.0876812	0.0155563				36.7105
394	400	1	6.26	YTVDAQN	1.0185	5.092	18.944	28.5105		1.13491	0.910754	1.86393	0.35426		0.0415	0.208	0.774	1.1645		0.0459619	0.0367696	0.0763675	0.0148492				3.1835	16.5265	25.2055	25.4825		0.897319	0.253851	0.682358	0.823779		0.13	0.675	1.0295	1.041		0.0367696	0.00989949	0.0275772	0.0339411				3.3365
394	407	2	16.34	YTVDAQNYGDVSRF	1.8955	7.141	12.832	19.859		0.758726	0.441235	1.2035	0.148492		0.1855	0.7005	1.2585	1.947		0.0742462	0.0431335	0.118087	0.0141421				2.9935	10.7245	14.84	21.431		0.22981	0.269408	0.166877	3.00803		0.2935	1.0515	1.4545	2.1015		0.0219203	0.026163	0.0162635	0.294864				3.276
394	432	5	19.38	YTVDAQNYGDVSRFFNHSCSPNIAIYSAVRNHGFRTIYD	5.5865	8.717	11.7465	16.9405		0.754483	0.244659	1.50826	0.572049		1.643	2.564	3.455	4.983		0.222032	0.0721249	0.444063	0.168291				5.551	9.4735	12.097	16.352		0.173948	0.655488	0.636396	2.43952		1.633	2.7865	3.558	4.8095		0.0509117	0.19304	0.186676	0.717713				7.1145
401	407	2	12.38	YGDVSRF	1.009	9.9045	14.9725	19.9345		0.892369	0.17607	0.269408	0.072832		0.041	0.405	0.6115	0.814		0.0367696	0.00707107	0.0106066	0.00282843				2.413	13.1305	16.7355	23.8075		0.578413	0.266579	0.495682	1.20562		0.0985	0.5365	0.6835	0.9725		0.0233345	0.0106066	0.0205061	0.0487904				2.63
408	416	2	11.07	FNHSCSPNI	3.271	7.857	8.856	10.486		1.96859	1.00833	1.14976	1.46088		0.1605	0.385	0.434	0.514		0.0968736	0.0494975	0.0565685	0.0721249				3.291	8.663	8.7545	10.128		0.571342	0.496389	0.335876	1.39866		0.1615	0.4245	0.4295	0.4965		0.0275772	0.0247487	0.0162635	0.0685894				4.498
408	417	2	10.17	FNHSCSPNIA	3.384	8.1425	7.5855	9.404		1.53442	0.946816	1.0345	0.414365		0.1935	0.4655	0.434	0.538		0.0883883	0.0544472	0.059397	0.0240416				3.2225	7.978	7.7145	9.8195		1.00763	0.517602	0.333047	1.98909		0.1845	0.456	0.4415	0.5615		0.0572756	0.0296985	0.0190919	0.113844				4.458
408	418	2	14.55	FNHSCSPNIAI	1.9455	4.168	6.2565	14.907		1.41068	0.842871	0.864792	0.263044		0.127	0.272	0.409	0.974		0.0919239	0.0551543	0.0565685	0.0169706				1.3485	3.903	4.588	12.2275		1.20986	0.561443	0.111723	2.32567		0.088	0.255	0.3	0.7995		0.079196	0.0367696	0.00707107	0.152028				2.8425
408	419	2	15.49	FNHSCSPNIAIY	1.9685	3.1135	4.8045	12.796		0.485782	0.523966	0.64276	0.903682		0.1445	0.229	0.3535	0.941		0.0360624	0.0381838	0.0473762	0.066468				1.085	2.4445	3.6215	10.771		0.309713	0.511238	0.0431335	1.01541		0.08	0.1795	0.2665	0.792		0.0226274	0.0374767	0.00353553	0.0749533				2.173
408	432	5	16.87	FNHSCSPNIAIYSAVRNHGFRTIYD	8.1455	10.9525	13.377	18.916		0.888833	0.598919	2.0492	0.470933		1.464	1.9685	2.4045	3.4		0.159806	0.108187	0.368403	0.0848528				7.891	10.717	12.2855	15.9185		0.373352	1.32088	0.115258	2.12344		1.4185	1.926	2.2085	2.861		0.0671751	0.237588	0.0205061	0.381838				10.394
418	432	3	12.68	IYSAVRNHGFRTIYD	9.561	14.0585	16.3775	17.9315		0.759433	0.0502046	1.37532	1.41916		1.0155	1.493	1.7395	1.9045		0.0813173	0.00565685	0.146371	0.150614				9.4285	15.137	17.839	19.2805		0.365574	1.05076	0.357796	2.61135		1.0015	1.608	1.895	2.048		0.0388909	0.111723	0.0381838	0.277186				12.09
419	432	3	11.94	YSAVRNHGFRTIYD	9.476	14.5935	18.005	19.5695		1.41846	0.31042	2.13971	0.248194		0.929	1.4305	1.7655	1.9185		0.138593	0.0304056	0.210011	0.0247487				9.497	15.753	18.575	20.052		0.162635	0.883883	0.039598	2.89914		0.931	1.5445	1.821	1.966		0.0155563	0.0869741	0.00424264	0.284257				12.417
419	435	4	18.58	YSAVRNHGFRTIYDLAF	5.175	9.2005	12.168	13.2215		0.663266	0.0982878	1.4326	0.857721		0.6345	1.1275	1.491	1.6205		0.0813173	0.0120208	0.175362	0.105359				4.505	9.854	13.1805	15.387		0.275772	0.981464	0.127986	1.66877		0.552	1.208	1.615	1.8855		0.0339411	0.120208	0.0155563	0.204354				7.341
420	432	3	10.99	SAVRNHGFRTIYD	10.6155	16.825	20.3145	21.032		1.3131	0.774989	2.01738	2.28961		0.954	1.512	1.826	1.8905		0.11738	0.0692965	0.181019	0.205768				10.8045	18.077	21.2065	23.9165		0.282136	1.2035	0.294864	3.27744		0.971	1.6245	1.906	2.1495		0.0254558	0.108187	0.0268701	0.294864				14.2565
427	435	2	19.46	FRTIYDLAF	3.7035	10.8045	14.661	17.3355		1.29471	0.556493	0.039598	1.0642		0.2115	0.6175	0.8385	0.991		0.0742462	0.0318198	0.00212132	0.0608112				3.733	10.6595	14.687	17.4325		0.731148	0.76014	1.70837	3.61827		0.2135	0.6095	0.84	0.997		0.0417193	0.0431335	0.0975807	0.206475				5.4875
436	446	2	16.74	FAIKDIQPLEE	2.1145	5.5975	6.6035	12.479		0.837922	0.447599	1.10238	0.732563		0.1385	0.366	0.432	0.816		0.0544472	0.0296985	0.0721249	0.0480833				2.304	6.203	7.103	13.6295		0.424264	0.667509	0.100409	2.76691		0.1505	0.4055	0.4645	0.891		0.0275772	0.0431335	0.00636396	0.181019				3.5505
436	447	2	18.67	FAIKDIQPLEEL	2.5045	7.595	8.102	11.26		0.593263	0.00565685	1.03379	0.814587		0.184	0.5585	0.5955	0.828		0.0438406	0.000707107	0.0756604	0.059397				2.8865	7.0825	7.934	11.3845		0.122329	1.08117	1.15966	2.55619		0.2125	0.521	0.5835	0.837		0.00919239	0.079196	0.0855599	0.18809				3.5895
437	446	2	12.82	AIKDIQPLEE	2.5925	6.5745	7.497	13.2055		0.382545	0.635689	1.44533	1.23673		0.1485	0.376	0.4285	0.755		0.0219203	0.0367696	0.0827315	0.0707107				2.476	6.609	8.3275	14.7295		0.709935	1.09036	0.140714	2.35254		0.1415	0.378	0.4765	0.8425		0.0403051	0.0622254	0.00777817	0.135057				3.33
450	473	4	11.57	DYAGAKDFSPVQSQKSQQNRISKL	34.9705	34.7625	36.717	35.235		1.77696	1.69211	5.46169	3.19895		5.9995	5.964	6.2995	6.045		0.304763	0.289914	0.936916	0.548715				33.9445	36.4875	36.588	37.3965		0.523966	1.2042	0.92631	5.65049		5.8235	6.26	6.2775	6.4165		0.0898026	0.206475	0.159099	0.969443				35.643
474	488	4	11.75	RRQCKCGSANCRGWL	6.169	16.542	18.224	18.233		1.26714	0.687308	1.64049	0.285671		0.655	1.757	1.9355	1.9365		0.13435	0.0735391	0.174655	0.0304056				5.2835	16.974	19.1015	19.306		0.490025	1.00551	0.0318198	2.81287		0.561	1.8025	2.0285	2.0505		0.0523259	0.106773	0.00353553	0.299106				7.6415
Differences in deuteration levels between Clr4 alone and when associated with each of the peptides
Peptides that show changes > 7 % and > 0.6 Da between two conditions are colored in blue and red whether the peptide is more protected or exposed respectively
					Differences between Clr4 + H3K14ub and Clr4 alone					Differences between Clr4 + H3K14ub and Clr4 alone					Differences between Clr4 + H3 and Clr4 alone					Differences between Clr4 + H3 and Clr4 alone
					% Deuteration					Nb of deuterons					% Deuteration					Nb of deuterons
Start	End	Charge	RT	Start	3s	30s	300s	3000s		3s	30s	300s	3000s		3s	30s	300s	3000s		3s	30s	300s	3000s
192	200	2	12.23	SKLDSYTHL	-0.103	2.508	0.1855	0.749		-0.006	0.1435	0.011	0.0425		4.274	1.575	-2.3995	-1.639		0.244	0.0905	-0.1375	-0.094
192	202	2	16.24	SKLDSYTHLSF	0.603	1.8825	-0.132	-0.2715		0.044	0.1385	-0.0095	-0.0195		4.847	2.31	-2.107	-1.014		0.3565	0.17	-0.1545	-0.0745
195	202	2	16.7	DSYTHLSF	0.6725	0.764	1.3655	-0.652		0.033	0.037	0.067	-0.032		5.082	1.7525	-2.656	-1.795		0.249	0.0855	-0.13	-0.0875
203	208	2	4.8	YEKREL	-0.4435	0.3775	0.075	-0.6215		-0.0145	0.012	0.0025	-0.02		0.0345	-1.0435	-1.1115	-1.527		0.001	-0.0345	-0.036	-0.05
203	215	4	6.13	YEKRELFRKKLRE	-0.0385	-0.004	-0.2475	-0.6825		-0.0035	-0.0005	-0.022	-0.0615		0.1705	-0.286	-0.913	-0.8665		0.0155	-0.026	-0.0815	-0.078
209	223	3	12.01	FRKKLREIEGPEVTL	-0.026	0.4695	0.448	0.2665		-0.0025	0.046	0.044	0.0265		1.717	0.318	-1.369	-1.6275		0.1685	0.031	-0.134	-0.159
209	223	4	12.01	FRKKLREIEGPEVTL	0.361	0.709	0.3685	0.1445		0.035	0.0695	0.0365	0.0145		2.0375	0.5065	-0.7865	-1.4225		0.2	0.0495	-0.077	-0.139
216	223	1	16.35	IEGPEVTL	-0.1655	0.7795	0.8075	0.028		-0.007	0.0315	0.033	0.001		2.0285	-1.0535	-2.9655	-2.483		0.083	-0.043	-0.1215	-0.1015
224	236	1	14.46	VNEVDDEPCPSLD	-2.0015	-0.1295	-0.221	1.601		-0.147	-0.0095	-0.0165	0.1175		3.419	1.858	-0.138	1.5515		0.2515	0.137	-0.01	0.114
224	237	1	18.62	VNEVDDEPCPSLDF	-1.92	-0.852	-4.105	2.2335		-0.157	-0.0695	-0.3355	0.1825		4.421	2.48	-1.476	1.9685		0.3615	0.203	-0.121	0.1605
237	242	1	16.27	FQFISQ	4.56	3.095	9.2315	2.2565		0.149	0.101	0.302	0.074		5.279	2.0135	3.001	1.501		0.172	0.066	0.0985	0.049
243	256	2	17.33	YRLTQGVIPPDPNF	-13.655	-13.593	-5.5405	-3.23		-1.0045	-1	-0.408	-0.2375		5.616	0.665	-0.286	2.2865		0.413	0.048	-0.021	0.168
243	261	2	15.98	YRLTQGVIPPDPNFQSGCN	-14.1705	-12.341	-7.4945	-4.8795		-1.621	-1.4115	-0.857	-0.5585		5.6635	0.896	0.2515	2.938		0.6475	0.1025	0.0285	0.336
262	276	2	12.44	CSSLGGCDLNNPSRC	-0.6035	0.0005	-0.087	0.346		-0.0595	0.0005	-0.008	0.0335		3.1965	1.2175	-1.465	-0.9105		0.313	0.1195	-0.1435	-0.089
263	276	2	11.97	SSLGGCDLNNPSRC	-0.6955	0.182	0.6925	0.7905		-0.0625	0.0165	0.0625	0.071		2.6255	0.0035	-2.489	-1.6305		0.236	0.0005	-0.2235	-0.1465
263	278	2	13.52	SSLGGCDLNNPSRCEC	-1.3165	-0.4215	0.3265	-0.8555		-0.14	-0.0445	0.0345	-0.091		3.499	1.272	-1.219	-0.321		0.3715	0.1355	-0.1295	-0.034
270	276	2	4.08	LNNPSRC	0.5265	-0.983	-7.6415	-0.6045		0.0175	-0.0325	-0.2495	-0.0195		0.262	-3.186	-5.583	-1.491		0.0085	-0.1045	-0.1825	-0.0485
279	288	2	15.38	LDDLDEPTHF	-2.224	-1.4825	0.3745	0.317		-0.127	-0.085	0.022	0.0175		2.227	1.481	-0.6495	-1.6705		0.1275	0.0845	-0.037	-0.096
279	290	2	16.75	LDDLDEPTHFAY	-1.0055	-3.5305	-4.435	-1.0705		-0.074	-0.2595	-0.3265	-0.0785		2.032	0.3835	-2.2325	0.0485		0.1495	0.0285	-0.1645	0.004
279	301	3	14.87	LDDLDEPTHFAYDAQGRVRADTG	-1.1985	-4.0905	-10.851	-3.182		-0.1955	-0.668	-1.773	-0.52		1.554	-1.8845	-7.682	-1.5805		0.254	-0.3075	-1.255	-0.2585
280	288	2	14.25	DDLDEPTHF	-1.752	-0.6605	0.2395	1.5605		-0.0865	-0.033	0.012	0.0765		2.478	1.093	-1.817	-0.8735		0.1215	0.0535	-0.089	-0.0425
280	290	2	16.03	DDLDEPTHFAY	-1.8625	-3.4425	-3.615	-1.109		-0.122	-0.2245	-0.236	-0.072		1.4815	0.079	-2.0015	0.2675		0.0965	0.0055	-0.131	0.0175
280	302	3	15.07	DDLDEPTHFAYDAQGRVRADTGA	-1.8535	-4.072	-10.2605	-1.8055		-0.303	-0.665	-1.676	-0.295		1.209	-2.8355	-5.156	-1.0005		0.198	-0.4635	-0.8425	-0.1635
282	288	2	11.86	LDEPTHF	2.6985	-0.9155	1.8735	0.795		0.088	-0.0295	0.061	0.026		4.9415	-1.646	-2.619	-2.1015		0.162	-0.0535	-0.0855	-0.0685
289	302	2	7.58	AYDAQGRVRADTGA	-2.3975	-4.8215	-7.7175	2.614		-0.235	-0.4725	-0.7565	0.2565		1.0465	-4.9475	-4.3765	-0.742		0.1025	-0.485	-0.429	-0.0725
289	302	3	7.58	AYDAQGRVRADTGA	-3.1965	-5.8125	-6.844	-1.4315		-0.3135	-0.5705	-0.671	-0.1405		-0.216	-3.7815	-5.033	-1.188		-0.0215	-0.3715	-0.4935	-0.1165
291	305	3	12.21	DAQGRVRADTGAVIY	-2.617	-2.836	-10.212	-0.15		-0.278	-0.3015	-1.0845	-0.016		-0.0275	-2.5845	-7.43	-0.5035		-0.003	-0.275	-0.789	-0.0535
303	310	1	16.77	VIYECNSF	1.5265	-1.3595	-3.542	-0.3465		0.075	-0.0665	-0.174	-0.017		2.3065	-0.5135	-0.456	0.564		0.1135	-0.025	-0.0225	0.0275
306	310	1	10.29	ECNSF	-0.3125	-2.6535	-7.951	0.3635		-0.0075	-0.0645	-0.195	0.0085		0.559	-0.705	-1.3055	-1.1475		0.014	-0.017	-0.0325	-0.0285
310	314	1	7.16	FCSCS	-1.4475	-0.2555	0.3485	-2.245		-0.035	-0.0065	0.0085	-0.055		3.1555	-0.129	1.191	-0.0385		0.0775	-0.0035	0.0295	-0.001
315	333	4	18.12	MECPNRVVQRGRTLPLEIF	-0.1335	-0.34	-0.1165	-2.1395		-0.0165	-0.0415	-0.015	-0.2625		0.9035	0.4795	-0.204	-0.8085		0.1105	0.059	-0.0255	-0.099
333	353	4	15.74	FKTKEKGWGVRSLRFAPAGTF	-0.281	0.169	-0.224	-0.089		-0.0415	0.025	-0.033	-0.0135		0.8485	0.573	-0.675	-0.255		0.1245	0.0845	-0.0995	-0.038
334	352	5	12.69	KTKEKGWGVRSLRFAPAGT	0.4045	0.1195	0.3175	0.984		0.0525	0.0155	0.0415	0.1285		1.1185	-0.3225	-0.9305	-0.278		0.146	-0.042	-0.122	-0.0365
334	353	4	15.14	KTKEKGWGVRSLRFAPAGTF	0.014	0.3975	-0.1935	0.108		0.002	0.055	-0.027	0.0145		0.867	0.309	-1.0175	-0.6395		0.1205	0.043	-0.1415	-0.089
346	353	2	13.93	RFAPAGTF	-2.093	-0.2775	-0.892	-1.5025		-0.0855	-0.011	-0.0365	-0.0615		-1.7685	0.16	-0.979	-2.6345		-0.072	0.0065	-0.0405	-0.1075
354	358	1	17.31	ITCYL	-2.0995	-0.3305	0.847	1.897		-0.052	-0.008	0.0205	0.0465		-1.2425	-1.086	-3.424	-2.495		-0.031	-0.027	-0.084	-0.061
358	366	1	11.35	LGEVITSAE	-0.3515	0.1005	-2.523	0.943		-0.0205	0.0055	-0.145	0.054		1.802	-0.2265	-1.5925	-0.108		0.103	-0.0135	-0.0915	-0.006
359	382	3	14.82	GEVITSAEAAKRDKNYDDDGITYL	0.571	-2.0265	-2.1005	-0.214		0.103	-0.3645	-0.377	-0.0385		5.578	0.5855	-1.2875	0.3155		1.0025	0.105	-0.231	0.0565
361	366	1	4.45	VITSAE	-0.3955	-1.6725	-4.5975	0.6515		-0.013	-0.055	-0.1505	0.0215		0.807	-2.1535	-4.272	-2.953		0.0265	-0.0705	-0.1395	-0.0965
361	382	3	14.36	VITSAEAAKRDKNYDDDGITYL	1.696	-0.8155	-0.7505	0.8235		0.277	-0.133	-0.123	0.1345		5.619	1.1015	-1.5615	-0.207		0.9185	0.18	-0.2555	-0.0335
367	382	2	13.9	AAKRDKNYDDDGITYL	5.039	3.5	0.1545	0.8585		0.576	0.401	0.0175	0.0985		7.5845	2.964	-1.4875	-0.4805		0.8675	0.3395	-0.17	-0.0545
383	387	1	17.68	FDLDM	-1.227	-2.5105	-1.4345	-2.1135		-0.0305	-0.0615	-0.035	-0.0515		0.2445	0.4095	0.2315	-1.7635		0.0055	0.01	0.0055	-0.043
388	393	1	5.96	FDDASE	2.142	0.305	-0.114	0.8215		0.07	0.0095	-0.0035	0.027		6.973	0.8455	-1.8045	-0.1075		0.2275	0.0275	-0.0585	-0.004
394	400	1	6.26	YTVDAQN	2.165	11.4345	6.2615	-3.028		0.0885	0.467	0.2555	-0.1235		2.318	7.046	4.879	-2.2625		0.0945	0.288	0.199	-0.092
394	407	2	16.34	YTVDAQNYGDVSRF	1.098	3.5835	2.008	1.572		0.108	0.351	0.196	0.1545		1.3805	2.361	1.671	1.2595		0.1355	0.231	0.1635	0.123
394	432	5	19.38	YTVDAQNYGDVSRFFNHSCSPNIAIYSAVRNHGFRTIYD	-0.0355	0.7565	0.3505	-0.5885		-0.01	0.2225	0.103	-0.1735		1.528	0.976	0.6715	0.6845		0.4495	0.287	0.1975	0.201
401	407	2	12.38	YGDVSRF	1.404	3.226	1.763	3.873		0.0575	0.1315	0.072	0.1585		1.621	0.9985	-0.1365	1.876		0.0665	0.0405	-0.005	0.077
408	416	2	11.07	FNHSCSPNI	0.02	0.806	-0.1015	-0.358		0.001	0.0395	-0.0045	-0.0175		1.227	-0.11	-1.1015	-1.831		0.06	-0.005	-0.054	-0.09
408	417	2	10.17	FNHSCSPNIA	-0.1615	-0.1645	0.129	0.4155		-0.009	-0.0095	0.0075	0.0235		1.074	-0.4285	-0.3735	-1.0205		0.0615	-0.0245	-0.0215	-0.0585
408	418	2	14.55	FNHSCSPNIAI	-0.597	-0.265	-1.6685	-2.6795		-0.039	-0.017	-0.109	-0.1745		0.897	0.54	-0.872	-0.859		0.059	0.0355	-0.057	-0.0555
408	419	2	15.49	FNHSCSPNIAIY	-0.8835	-0.669	-1.183	-2.025		-0.0645	-0.0495	-0.087	-0.149		0.2045	0.1505	-0.453	-0.796		0.015	0.011	-0.0335	-0.0585
408	432	5	16.87	FNHSCSPNIAIYSAVRNHGFRTIYD	-0.2545	-0.2355	-1.0915	-2.9975		-0.0455	-0.0425	-0.196	-0.539		2.2485	0.6	-0.1335	-0.891		0.404	0.108	-0.024	-0.16
418	432	3	12.68	IYSAVRNHGFRTIYD	-0.1325	1.0785	1.4615	1.349		-0.014	0.115	0.1555	0.1435		2.529	0.4215	0.0605	0.432		0.2685	0.0445	0.0065	0.0455
419	432	3	11.94	YSAVRNHGFRTIYD	0.021	1.1595	0.57	0.4825		0.002	0.114	0.0555	0.0475		2.941	0.3345	-0.8715	0.0425		0.2885	0.033	-0.086	0.004
419	435	4	18.58	YSAVRNHGFRTIYDLAF	-0.67	0.6535	1.0125	2.1655		-0.0825	0.0805	0.124	0.265		2.166	0.679	0.0405	2.2535		0.2655	0.083	0.0055	0.276
420	432	3	10.99	SAVRNHGFRTIYD	0.189	1.252	0.892	2.8845		0.017	0.1125	0.08	0.259		3.641	0.004	-0.8375	0.716		0.3275	0	-0.0755	0.064
427	435	2	19.46	FRTIYDLAF	0.0295	-0.145	0.026	0.097		0.002	-0.008	0.0015	0.006		1.784	0.845	0.3015	2.629		0.1025	0.0485	0.0175	0.1505
436	446	2	16.74	FAIKDIQPLEE	0.1895	0.6055	0.4995	1.1505		0.012	0.0395	0.0325	0.075		1.436	1.028	0.6885	0.517		0.0935	0.067	0.0445	0.0335
436	447	2	18.67	FAIKDIQPLEEL	0.382	-0.5125	-0.168	0.1245		0.0285	-0.0375	-0.012	0.009		1.085	0.427	0.0675	0.1115		0.08	0.0315	0.005	0.0085
437	446	2	12.82	AIKDIQPLEE	-0.1165	0.0345	0.8305	1.524		-0.007	0.002	0.048	0.0875		0.7375	0.2555	-0.4185	-0.1025		0.042	0.015	-0.0235	-0.0055
450	473	4	11.57	DYAGAKDFSPVQSQKSQQNRISKL	-1.026	1.725	-0.129	2.1615		-0.176	0.296	-0.022	0.3715		0.6725	3.0405	-0.6865	1.084		0.1155	0.5215	-0.118	0.186
474	488	4	11.75	RRQCKCGSANCRGWL	-0.8855	0.432	0.8775	1.073		-0.094	0.0455	0.093	0.114		1.4725	0.852	0.6535	0.144		0.1565	0.09	0.0695	0.015
[truncated: 15 more columns]
