# Supplementary material for: SUV39 SET domains mediate crosstalk of heterochromatic histone marks
Source: eLife. 2021 Sep 15;10:e62682. doi: 10.7554/eLife.62682 (PMC8443253; doi:10.7554/eLife.62682)
Supplement: Supplementary file 3. [file elife-62682-supp3.xlsx]

## Sheet: Ubiq_deuteration_table
Table S6
Deuteration table showing deuterium incorporation levels for H3K14ub peptide alone (H3-Ubiq.) and when in complex with Clr4 (Clr4 + H3-Ubiq.)
For each peptide analyzed, deuteration levels are shown as percentage deuteration compared to to the theretical maximal deuteration level (% Deuteration) and as the number of deuterons (Nb of deuterons). Standard deviation for each measurement is shown on the right.
						H3-Ubiq.					H3-Ubiq.					H3-Ubiq.					H3-Ubiq.							Clr4 + H3-Ubiq.					Clr4 + H3-Ubiq.					Clr4 + H3-Ubiq.					Clr4 + H3-Ubiq.
					% Deuteration					Std. Dev (% deut)					Nb of deuterons					Std. Dev (# deut)							% Deuteration					Std. Dev (% deut)					Nb of deuterons					Std. Dev (# deut)
Start	End	Charge	RT	Start	3s	30s	300s	3000s		3s	30s	300s	3000s		3s	30s	300s	3000s		3s	30s	300s	3000s				3s	30s	300s	3000s		3s	30s	300s	3000s		3s	30s	300s	3000s		3s	30s	300s	3000s
1	15	3	17.87	MQIFVKTLTGKTITL	18.368	17.6865	19.254	25.249		0.132936	0.671044	0.291328	3.50301		1.97	1.897	2.065	2.708		0.0141421	0.0721249	0.0311127	0.376181				14.525	14.3285	14.752	21.318		0.108894	1.25794	1.10733	4.78287		1.558	1.5365	1.582	2.2865		0.0113137	0.135057	0.118794	0.512652
5	15	2	13.53	VKTLTGKTITL	31.209	29.44	31.7535	38.5645		0.0919239	1.17097	1.83636	4.76519		2.317	2.1855	2.3575	2.8635		0.00707107	0.0869741	0.136472	0.35426				27.03	28.268	30.282	38.2105		0.379009	1.90636	1.80029	4.36497		2.007	2.099	2.2485	2.837		0.0282843	0.141421	0.133643	0.323855
16	24	1	9.81	EVEPSDTIE	8.5865	14.106	21.188	42.06		0.188798	0.253144	-	-		0.425	0.698	1.049	2.082		0.00989949	0.0127279	-	-				6.0765	11.275	16.886	35.3725		0.924189	0.403051	3.01793	3.79787		0.3005	0.558	0.8355	1.751		0.0459619	0.019799	0.1492	0.18809
25	43	4	8.31	NVKAKIQDKEGIPPDQQRL	5.551	21.292	36.7485	40.447		0.922067	0.564271	2.61983	1.17097		0.687	2.6345	4.5475	5.0055		0.114551	0.0700036	0.324562	0.144957				3.26	7.6785	20.5025	34.4315		0.882469	0.386787	0.340118	4.24618		0.4035	0.95	2.537	4.2605		0.109602	0.0480833	0.0424264	0.52538
25	45	4	13.74	NVKAKIQDKEGIPPDQQRLIF	3.6975	13.9585	25.103	30.069		0.150614	0.195869	1.92192	1.6716		0.5185	1.9575	3.5205	4.217		0.0205061	0.0275772	0.269408	0.234759				1.596	4.3745	14.456	24.7695		0.154149	0.366988	0.653367	3.42169		0.2235	0.6135	2.0275	3.474		0.0219203	0.0516188	0.0912168	0.479418
44	58	3	11.87	IFAGKQLEDGRTLSD	17.494	22.7385	31.537	40.179		0.883883	0.146371	-	-		1.876	2.439	3.382	4.309		0.0947523	0.0155563	-	-				9.6215	17.771	26.588	33.387		0.106773	1.63766	1.07904	4.87762		1.032	1.906	2.8515	3.581		0.0113137	0.175362	0.115258	0.523259
46	58	2	7.07	AGKQLEDGRTLSD	10.58	21.0605	33.0355	40.0245		1.02248	0.999142	2.34547	1.22683		0.9605	1.911	2.9975	3.6325		0.092631	0.0905097	0.212839	0.111016				6.995	16.924	25.935	35.6825		0.230517	1.01541	0.725492	3.34815		0.635	1.536	2.3535	3.238		0.0212132	0.0919239	0.0657609	0.304056
46	69	4	14.09	AGKQLEDGRTLSDYNIQKESTLHL	6.935	11	16.8985	24.2365		0.954594	0.770746	1.24097	2.79236		1.2585	1.9965	3.067	4.399		0.173241	0.1393	0.22486	0.506288				4.7155	9.738	13.147	18.7635		0.408001	0.519016	3.18622	5.43412		0.856	1.7675	2.386	3.4055		0.0735391	0.0940452	0.578413	0.986414
59	69	2	13.62	YNIQKESTLHL	9.7475	17.4645	25.922	36.7845		1.19572	0.62579	0.608112	0.563564		0.724	1.297	1.925	2.7315		0.0890955	0.046669	0.0452548	0.0417193				5.6	14.0575	16.48	21.353		0.0763675	1.74019	0.948937	5.17461		0.416	1.0435	1.2235	1.5855		0.00565685	0.129401	0.0700036	0.383959
Differences in deuteration levels between H3K14ub alone and when in complex with Clr4
Peptides that show changes > 9 % and > 1.3 Da between two conditions are colored in blue and red whether the peptide is more protected or exposed respectively
					% Deuteration					Nb of deuterons
Start	End	Charge	RT	Start	3s	30s	300s	3000s		3s	30s	300s	3000s
1	15	3	17.87	MQIFVKTLTGKTITL	-3.843	-3.358	-4.502	-3.931		-0.412	-0.3605	-0.483	-0.4215
5	15	2	13.53	VKTLTGKTITL	-4.179	-1.172	-1.4715	-0.354		-0.31	-0.0865	-0.109	-0.0265
16	24	1	9.81	EVEPSDTIE	-2.51	-2.831	-4.302	-6.6875		-0.1245	-0.14	-0.2135	-0.331
25	43	4	8.31	NVKAKIQDKEGIPPDQQRL	-2.291	-13.6135	-16.246	-6.0155		-0.2835	-1.6845	-2.0105	-0.745
25	45	4	13.74	NVKAKIQDKEGIPPDQQRLIF	-2.1015	-9.584	-10.647	-5.2995		-0.295	-1.344	-1.493	-0.743
44	58	3	11.87	IFAGKQLEDGRTLSD	-7.8725	-4.9675	-4.949	-6.792		-0.844	-0.533	-0.5305	-0.728
46	58	2	7.07	AGKQLEDGRTLSD	-3.585	-4.1365	-7.1005	-4.342		-0.3255	-0.375	-0.644	-0.3945
46	69	4	14.09	AGKQLEDGRTLSDYNIQKESTLHL	-2.2195	-1.262	-3.7515	-5.473		-0.4025	-0.229	-0.681	-0.9935
59	69	2	13.62	YNIQKESTLHL	-4.1475	-3.407	-9.442	-15.4315		-0.308	-0.2535	-0.7015	-1.146
