# Supplementary material for: SUV39 SET domains mediate crosstalk of heterochromatic histone marks
Source: eLife. 2021 Sep 15;10:e62682. doi: 10.7554/eLife.62682 (PMC8443253; doi:10.7554/eLife.62682)
Supplement: Supplementary file 4. [file elife-62682-supp4.xlsx]

## Sheet: TableSX_HDX_experimental detail
	Table S7
	HDX experimental details
		Clr4 protein analysis			Ubiquitin protein analysis
	Description :	Clr4	Clr4 + H3-Ubiq. pept	Clr4 + H3 pept	H3-K14 Ubiquitinated Peptide	H3-K14 peptide with Clr4
	Reaction volume :	50 ul	50 ul	50 ul	50 ul	50 ul
	% D2O in the reaction :	0.86	0.86	0.86	86.3	86.3
	temperature :	Room Temp	Room Temp	Room Temp	Room Temp	Room Temp
	Time course (sec) :	3, 30, 300, 3000	3, 30, 300, 3000	3, 30, 300, 3000	3s, 30s, 300s, 3000s	3s, 30s, 300s, 3000s
	Control sample :	Non-deuterated (ND) isolated Clr4 protein			Non-deuterated (ND) isolated H3-K14 Ubiquitinated peptide
	Quench buffer :	3 M Gdn-HCl/ 0.1 M NaH2PO4 pH 2.5/ 1 % Formic Acid			3 M guanidine – HCl/ 100 mM NaH2PO4 pH 2.5/ 1 % formic acid
	Quench buffer volume :	20 ul	20 ul	20 ul	20 ul	20 ul
	Number of peptides anayzed :	62	62	62	9	9
	Sequence coverage :	0.987	0.987	0.987	0.908	0.908
	Replicates (for each incubation time) :	2, 2, 2, 2	2, 2, 2, 2	2, 2, 2, 2	2, 2, 2, 2	2, 2, 2, 2
	Standard deviation average (all time points in % deuteration) :	1.56937	1.37925	1.27885	1.25238	1.80029
	Criteria for HDX rate difference :	Difference of HDX level at a given timepoint is > 7 % and > 0.6 Da and p values of student t-test is < 0.05			Difference of HDX level at a given timepoint is > 9 % and > 1.3 Da and p values of student t-test is < 0.05
